# Supplementary material
Source: PubMed Central journal article supplement (PMC4285441)
Supplement: NIHMS542520-supplement-Supp_Notes_and_Tables.pdf [file NIHMS542520-supplement-Supp_Notes_and_Tables.pdf]

## Supplementary Information

|                                                                              |      |
|------------------------------------------------------------------------------|------|
| Supplementary Note 1 – Reproducibility                                       | p. 2 |
| Supplementary Table 1 – Reproducibility statistics                           | p. 3 |
| Supplementary Note 2 – Influence of small effect sizes<br>on eQTL detection  | p. 4 |
| Supplementary Table 2 – Local X-pQTL results                                 | p. 6 |
| Supplementary Table 3 – Proteins affected by the<br>hotspot on chromosome II | p. 7 |

## Supplementary Note 1 – Reproducibility

We performed replication experiments for 27 genes. Of these, 22 were experimental replicates where the same segregant pool was thawed, grown and subjected to X-pQTL mapping at two different times. The remaining five replicates were done from independently generated crosses for a given gene. All replicates were processed several months apart from each other. We randomly assigned one of the two replicates as the detection set, and asked to what extent the X-pQTL identified in the detection set reproduced in the validation set.

Across the 27 detection experiments, we discovered 240 X-pQTL at genome-wide significance. We first asked whether the validation experiment had an allelic effect in the same direction (i.e. with higher expression associated with either the BY or the RM allele), irrespective of significance in the validation set. The direction of effect was concordant at 234 (97.5%) of the X-pQTL. We next asked what fraction of X-pQTL was reproduced at genome-wide significance in the replication set. We found that peaks with higher LOD scores were more likely to be reproduced, ranging from 58% replication at  $\text{LOD} \geq 4.5$  to perfect replication at higher LODs (Supplementary Table 1). Genome-wide significance in both datasets is a strict criterion for the small effects detected in our study. We therefore also employed a relaxed replication criterion, where we required the validation set to show an allele frequency difference of at least 0.05 (~ half that required for genome-wide significance) and a concordant direction of allelic effect. Using this criterion, 80% of loci reproduced at detection  $\text{LOD} \geq 4.5$ , rapidly approaching perfect replication at higher LOD thresholds (Supplementary Table 1).

In sum, we found that loci with strong effect virtually always reproduce. Loci of smaller effect sometimes fail to reach genome-wide significance in a replication experiment, likely due to stochastic variation in the influence of small-effect loci. Notably, even loci of small effect are still concordant in their direction of effect in the vast majority of cases. Extended Data Figure 4 illustrates these patterns for three genes.

Supplementary Table 1 – Reproducibility statistics

| LOD threshold<br>in detection set | X-pQTL | Replicated<br>genome-wide<br>significance | at<br>Replicated at relaxed significance<br>& concordant direction <sup>*</sup> |
|-----------------------------------|--------|-------------------------------------------|---------------------------------------------------------------------------------|
| 4.5                               | 240    | 139 (58%)                                 | 191 (80%)                                                                       |
| 5                                 | 216    | 128 (59%)                                 | 176 (81%)                                                                       |
| 10                                | 86     | 69 (80%)                                  | 78 (91%)                                                                        |
| 20                                | 30     | 29 (97%)                                  | 30 (100%)                                                                       |
| 50                                | 10     | 10 (100%)                                 | 10 (100%)                                                                       |

<sup>\*</sup>see Supplementary Note 1 for details

## Supplementary Note 2 – Influence of small effect sizes on eQTL detection

We sought to test to what extent X-pQTL that did not overlap a significant eQTL nevertheless influence mRNA levels. The analyses were restricted to the 701 X-pQTL that did not overlap a significant eQTL, were not located on chromosomes II and III, and were not located on the chromosome on which the given gene is located. For each of these X-pQTL, we extracted the published <sup>1</sup> mRNA levels of the given gene from segregants with the BY allele and from segregants with the RM allele. We then performed a T-test comparing these mRNA levels and recorded the p-value. The p-value distribution across all the examined positions was used to compute  $\pi_0$ , the fraction of true negative tests and  $\pi_1 = 1 - \pi_0$ , a lower bound for the fraction of true positive tests <sup>2</sup>.  $\pi_1$  thus provides a lower bound for the fraction of X-pQTL that affect mRNA levels. We used the R package qvalue <sup>2</sup> for these calculations.

We obtained an estimate of  $\pi_1 = 36\%$ . Taken at face value, this suggests that 64% of X-pQTL are due to genetic variation that specifically influences posttranscriptional regulation, without affecting mRNA levels. We sought to explore the alternative explanation that  $\pi_1$  might underestimate the fraction of true positive tests if effect sizes are small. We note that  $\pi_1$  is designed to be a lower bound of the fraction of true positive tests in a multiple testing scenario <sup>2</sup>, but we here sought to quantify this effect in more detail.

We performed simulations of the situation where a single position in a genome is tested for a difference in phenotypes (such as mRNA levels for a given gene) between haploid individuals of either of two genotypes. The test is a T-test of the phenotypes in the two groups. To form the two groups, we randomly sampled 50 phenotypes each from a normal distribution with standard deviation = 1. Individuals in the first group had mean phenotype = 0, while those in the second group had a higher mean phenotype = x. For  $x \ll 1$ , the expected variance explained by the group difference (i.e., the “eQTL” effect size) is  $x^2/4$ . For each x, we generated 5,000 sets of two groups (resembling 5,000 “genes”), performed a two-sided T-test in each set, recorded the p-values and calculated  $\pi_1$  from the distribution of the 5,000 p-values. Importantly, these simulations probe the behavior of  $\pi_1$  in the situation where *every* test is truly positive because x is never equal

to 0. If power were sufficiently high,  $\pi_1$  should equal 1 irrespective of  $x$ . Any lower value of  $\pi_1$  is a consequence of low power due the relatively small sample size of 100 individuals.

Extended Data Figure 7 shows that for high  $x$ ,  $\pi_1$  indeed approaches 1. At smaller  $x$ , however,  $\pi_1$  is reduced along with the power to detect individual “genes” to be significant. For very small  $x$ , power is at chance level, and  $\pi_1$  estimates are near zero. Importantly,  $\pi_1$  of 0.3 – 0.4 (as seen in our actual data) is reached at values of  $x$  that correspond to an effect size of 0.5 – 1% of variance explained (center row). Thus, rather than requiring wide-spread posttranscriptional consequences of genetic variation, the observed estimate of  $\pi_1$  can also be explained by many (perhaps most or even all) X-pQTL having real but small effects on mRNA levels.

## References for Supplementary Note 2

1. Smith, E. N. & Kruglyak, L. Gene–Environment Interaction in Yeast Gene Expression. *PLoS Biology* **6**, e83 (2008).
2. Storey, J. D. & Tibshirani, R. Statistical significance for genomewide studies. *Proceedings of the National Academy of Sciences* **100**, 9440–9445 (2003).

Supplementary Table 2 – Local X-pQTL results

| Gene    | Allele frequency difference | Local LOD |
|---------|-----------------------------|-----------|
| YAL005C | 0.06                        | 2.4       |
| YAL060W | 0.24                        | 23.9      |
| YBR067C | -0.18                       | 12.9      |
| YCL040W | 0.31                        | 31.5      |
| YDL126C | -0.15                       | 13.7      |
| YDL171C | -0.03                       | 0.5       |
| YEL002C | 0.01                        | 0.4       |
| YER069W | 0.11                        | 2.6       |
| YGL026C | -0.17                       | 8.6       |
| YGL195W | 0.15                        | 11.4      |
| YGL202W | -0.23                       | 27.7      |
| YGL253W | 0.88                        | 84.9      |
| YGR086C | 0.02                        | 0.5       |
| YGR204W | 0.50                        | 101.9     |
| YGR234W | -0.75                       | 252.0     |
| YHL011C | 0.03                        | 1.1       |
| YIR022W | -0.12                       | 7.9       |
| YJL052W | 0.11                        | 3.8       |
| YJL130C | -0.13                       | 6.4       |
| YJL201W | 0.01                        | 0.5       |
| YJR048W | 0.02                        | 0.8       |
| YKL029C | -0.75                       | 184.2     |
| YKL035W | -0.05                       | 0.9       |
| YKR059W | 0.05                        | 1.8       |
| YKR080W | 0.06                        | 1.5       |
| YLL026W | 0.74                        | 246.5     |
| YLR075W | -0.02                       | 0.4       |
| YLR179C | -0.81                       | 169.0     |
| YLR244C | 0.43                        | 72.0      |
| YLR325C | -0.04                       | 1.4       |
| YLR438W | 0.05                        | 1.0       |
| YML024W | 0.03                        | 1.1       |
| YMR315W | 0.16                        | 12.7      |
| YNL044W | 0.03                        | 0.5       |
| YNL055C | 0.66                        | 134.0     |
| YNL061W | -0.20                       | 20.0      |
| YNL134C | 0.49                        | 73.8      |
| YNR016C | 0.00                        | 0.4       |
| YPL028W | 0.01                        | 0.7       |
| YPL048W | -0.02                       | 0.4       |
| YPR156C | 0.07                        | 1.5       |

Supplementary Table 3 – Proteins affected by the hotspot on chromosome II

| Gene    | Hotspot effect | Function                                              | translation / ribosome related? |
|---------|----------------|-------------------------------------------------------|---------------------------------|
| RPS17A  | 0.30           | ribosomal protein small subunit                       | yes                             |
| TIF1    | 0.23           | translation initiation factor eIF4A                   | yes                             |
| PRT1    | 0.22           | translation initiation factor subunit eIF3b           | yes                             |
| TEF4    | 0.21           | translational elongation factor                       | yes                             |
| RPS25A  | 0.19           | ribosomal protein small subunit                       | yes                             |
| ADO1    | 0.18           | adenosine kinase                                      |                                 |
|         |                | Subunit of U3-containing 90S preribosome; involved in |                                 |
| UTP4    | 0.18           | 18S rRNA production                                   | yes                             |
| RPL9A   | 0.16           | ribosomal protein large subunit                       | yes                             |
| RPL19A  | 0.16           | ribosomal protein large subunit                       | yes                             |
| SUP45   | 0.16           | Polypeptide release factor eRF1                       | yes                             |
| RPL21B  | 0.16           | ribosomal protein large subunit                       | yes                             |
| LEU4    | 0.16           | leucine biosynthesis                                  |                                 |
| ILS1    | 0.15           | Isoleucine tRNA synthetase                            |                                 |
| RPL13B  | 0.15           | ribosomal protein large subunit                       | yes                             |
| CAM1    | 0.15           | transcription factor involved in ribosome biogenesis  | yes                             |
| YOP1    | 0.15           | membrane traffic                                      |                                 |
|         |                | elongase involved in fatty acid and sphingolipid      |                                 |
| SUR4    | 0.14           | biosynthesis                                          |                                 |
| URA5    | 0.14           | pyrimidine biosynthesis                               |                                 |
| RPL10   | 0.14           | ribosomal protein large subunit                       | yes                             |
|         |                | biosynthesis of purines, thymidylate, methionine, and |                                 |
| ADE3    | 0.13           | histidine                                             |                                 |
|         |                | pre-rRNA processing, 18S rRNA synthesis, and snoRNA   |                                 |
| NOP58   | 0.13           | synthesis                                             | yes                             |
| ILV6    | 0.12           | branched-chain amino acid biosynthesis                |                                 |
| SMI1    | 0.12           | cell wall synthesis                                   |                                 |
|         |                | Poly (A)+ RNA-binding protein required for mRNA       |                                 |
| PUB1    | 0.11           | stability                                             |                                 |
| TPI1    | 0.11           | Triose phosphate isomerase involved in glycolysis     |                                 |
| LHP1    | 0.11           | tRNA processing                                       |                                 |
| YIP3    | 0.11           | ER to Golgi transport                                 |                                 |
| TIF3    | 0.11           | Translation initiation factor eIF-4B                  | yes                             |
| TRX2    | 0.11           | cell redox homeostasis                                |                                 |
| URA2    | 0.11           | pyrimidine biosynthesis                               |                                 |
| ERG10   | 0.11           | ergosterol biosynthesis                               |                                 |
| TRX1    | 0.10           | cell redox homeostasis                                |                                 |
| CPR1    | 0.10           | cellular protein metabolism                           |                                 |
| YLR413W | 0.10           | unknown                                               |                                 |
| DBP3    | 0.10           | rRNA processing                                       | yes                             |
| YLR179C | 0.10           | unknown                                               |                                 |

---

|        |       |                                                    |
|--------|-------|----------------------------------------------------|
| PFY1   | 0.09  | cytoskeleton organization                          |
| LIA1   | 0.09  | cytoskeleton organization                          |
| COX17  | 0.09  | copper transport, mitochondrial respiration        |
| PRS3   | 0.09  | nucleotide, histidine, and tryptophan biosynthesis |
| TDH3   | 0.08  | glycolysis                                         |
| PDB1   | 0.08  | pyruvate dehydrogenase                             |
| TPO1   | 0.08  | transmembrane transporter                          |
| PHO86  | 0.08  | ER to Golgi transport                              |
| ZWF1   | 0.07  | pentose phosphate pathway                          |
| WBP1   | 0.07  | protein glycosylation                              |
| CIT1   | -0.10 | citrate synthase, TCA cycle                        |
| HSP104 | -0.13 | chaperone                                          |
| GPH1   | -0.15 | glycogen phosphorylase                             |

---
